# Supplementary material
Source: PubMed Central journal article supplement (PMC7376473)
Supplement: jamacardiol-e202739-s001.pdf [file jamacardiol-e202739-s001.pdf]

## Supplementary Online Content

Wang N, Salam A, Webster R, et al; TRIUMPH Study Group. Association of low-dose triple combination therapy with therapeutic inertia and prescribing patterns in patients with hypertension: a secondary analysis of the TRIUMPH trial. *JAMA Cardiol*. Published online July 22, 2020. doi:10.1001/jamacardio.2020.2739

**eTable 1.** Ten most common clinical pathways among patients in the triple pill and usual care groups

**eTable 2.** Multivariate predictors of intensification of BP-lowering drug therapy after not reaching BP target

**eFigure 1.** Treatment patterns according to BP-lowering drug class and achievement of BP target

**eFigure 2.** Number of unique clinical pathways among patients in the triple pill and usual care groups

This supplementary material has been provided by the authors to give readers additional information about their work.

**eTable 1.** Ten most common clinical pathways among patients in the triple pill and usual care groups

| Ranking by frequency     | Intensified at randomization? | Target at Week 6? | Intensified at Week 6? | Target at Week 12? | Intensified at Week 12? | Target at Week 26? | Number of patients | % of patients* |
|--------------------------|-------------------------------|-------------------|------------------------|--------------------|-------------------------|--------------------|--------------------|----------------|
| <b>Triple Pill group</b> |                               |                   |                        |                    |                         |                    |                    |                |
| 1                        | Yes                           | Yes               | No                     | Yes                | No                      | Yes                | 146                | 47%            |
| 2                        | Yes                           | No                | No                     | No                 | No                      | No                 | 28                 | 9%             |
| 3                        | Yes                           | No                | No                     | Yes                | No                      | Yes                | 27                 | 9%             |
| 4                        | Yes                           | Yes               | No                     | Yes                | No                      | No                 | 26                 | 8%             |
| 5                        | Yes                           | No                | No                     | Yes                | No                      | No                 | 14                 | 5%             |
| 6                        | Yes                           | No                | No                     | No                 | No                      | Yes                | 14                 | 5%             |
| 7                        | Yes                           | Yes               | No                     | No                 | No                      | Yes                | 13                 | 4%             |
| 8                        | Yes                           | Yes               | No                     | No                 | No                      | No                 | 12                 | 4%             |
| 9                        | Yes                           | No                | No                     | No                 | Yes                     | No                 | 5                  | 2%             |
| 10                       | Yes                           | Yes               | No                     | Yes                | Yes                     | Yes                | 4                  | 1%             |
| <b>Usual Care group</b>  |                               |                   |                        |                    |                         |                    |                    |                |
| 1                        | Yes                           | Yes               | No                     | Yes                | No                      | Yes                | 47                 | 14%            |
| 2                        | Yes                           | No                | No                     | No                 | No                      | No                 | 19                 | 6%             |
| 3                        | No                            | No                | No                     | No                 | No                      | No                 | 18                 | 6%             |
| 4                        | Yes                           | No                | Yes                    | No                 | No                      | No                 | 14                 | 4%             |
| 5                        | Yes                           | No                | No                     | Yes                | No                      | Yes                | 14                 | 4%             |
| 6                        | Yes                           | Yes               | No                     | No                 | No                      | Yes                | 12                 | 4%             |
| 7                        | Yes                           | No                | No                     | No                 | Yes                     | No                 | 12                 | 4%             |
| 8                        | Yes                           | No                | No                     | No                 | No                      | Yes                | 12                 | 4%             |
| 9                        | No                            | Yes               | No                     | Yes                | No                      | Yes                | 11                 | 3%             |
| 10                       | Yes                           | Yes               | No                     | Yes                | No                      | No                 | 10                 | 3%             |

\* the total number of participants were 311 vs 326 and number with missing values were 38 vs 25 for triple pill and usual care groups, respectively. Red indicates therapeutic inertia, defined as those who did not reach target and did not receive treatment intensification

**eTable 2.** Multivariate predictors of intensification of BP-lowering drug therapy after not reaching BP target

|                                                              | Triple Pill             |         | Usual Care              |         | All patients            |         |
|--------------------------------------------------------------|-------------------------|---------|-------------------------|---------|-------------------------|---------|
|                                                              | Adjusted OR<br>(95% CI) | p-value | Adjusted OR<br>(95% CI) | p-value | Adjusted OR<br>(95% CI) | p-value |
| <b>Randomisation</b>                                         |                         |         |                         |         |                         |         |
| SBP during visit<br>(per 10 mmHg higher)                     | 0.29 (0.11, 0.78)       | 0.014   | 1.47 (1.02, 2.12)       | 0.039   | -                       | -       |
| Number of non-BP pills at visit<br>(per 1 pill more)         | 0.71 (0.56, 0.90)       | 0.005   | -                       | -       | -                       | -       |
| Number of BP medications at visit<br>(per 1 medication more) | -                       | -       | 0.03 (0.00-0.18)        | <0.001  | 0.05 (0.01, 0.21)       | <0.001  |
| Randomisation to triple pill arm                             | -                       | -       | -                       | -       | 47.3 (18.2, 122.8)      | <0.001  |
| <b>Week 6</b>                                                |                         |         |                         |         |                         |         |
| SBP during visit<br>(per 10 mmHg higher)                     | -                       | -       | 1.69 (1.27, 2.28)       | <0.001  | 1.63 (1.28, 2.06)       | <0.001  |
| Secondary/Tertiary education<br>versus primary/no education  | 0.19 (0.04, 0.95)       | 0.043   | -                       | -       | 0.51 (0.27, 0.94)       | 0.031   |
| <b>Week 12</b>                                               |                         |         |                         |         |                         |         |
| SBP during visit<br>(per 1mmHg higher)                       | 2.17 (1.09, 4.30)       | 0.026   | 2.35 (1.58, 3.52)       | <0.001  | 2.06 (1.51, 2.84)       | <0.001  |
| Male sex                                                     | -                       | -       | 0.32 (0.12, 0.84)       | 0.021   | -                       | -       |
| Anxiety/depression                                           | -                       | -       | 4.42 (1.69, 11.6)       | 0.002   | 3.02 (1.37, 6.67)       | 0.006   |

A full list of included variables in the multivariate model can be found in supplementary table 2. BP, blood pressure; SBP, systolic blood pressure

**eFigure 1.** Treatment patterns according to BP-lowering drug class and achievement of BP target

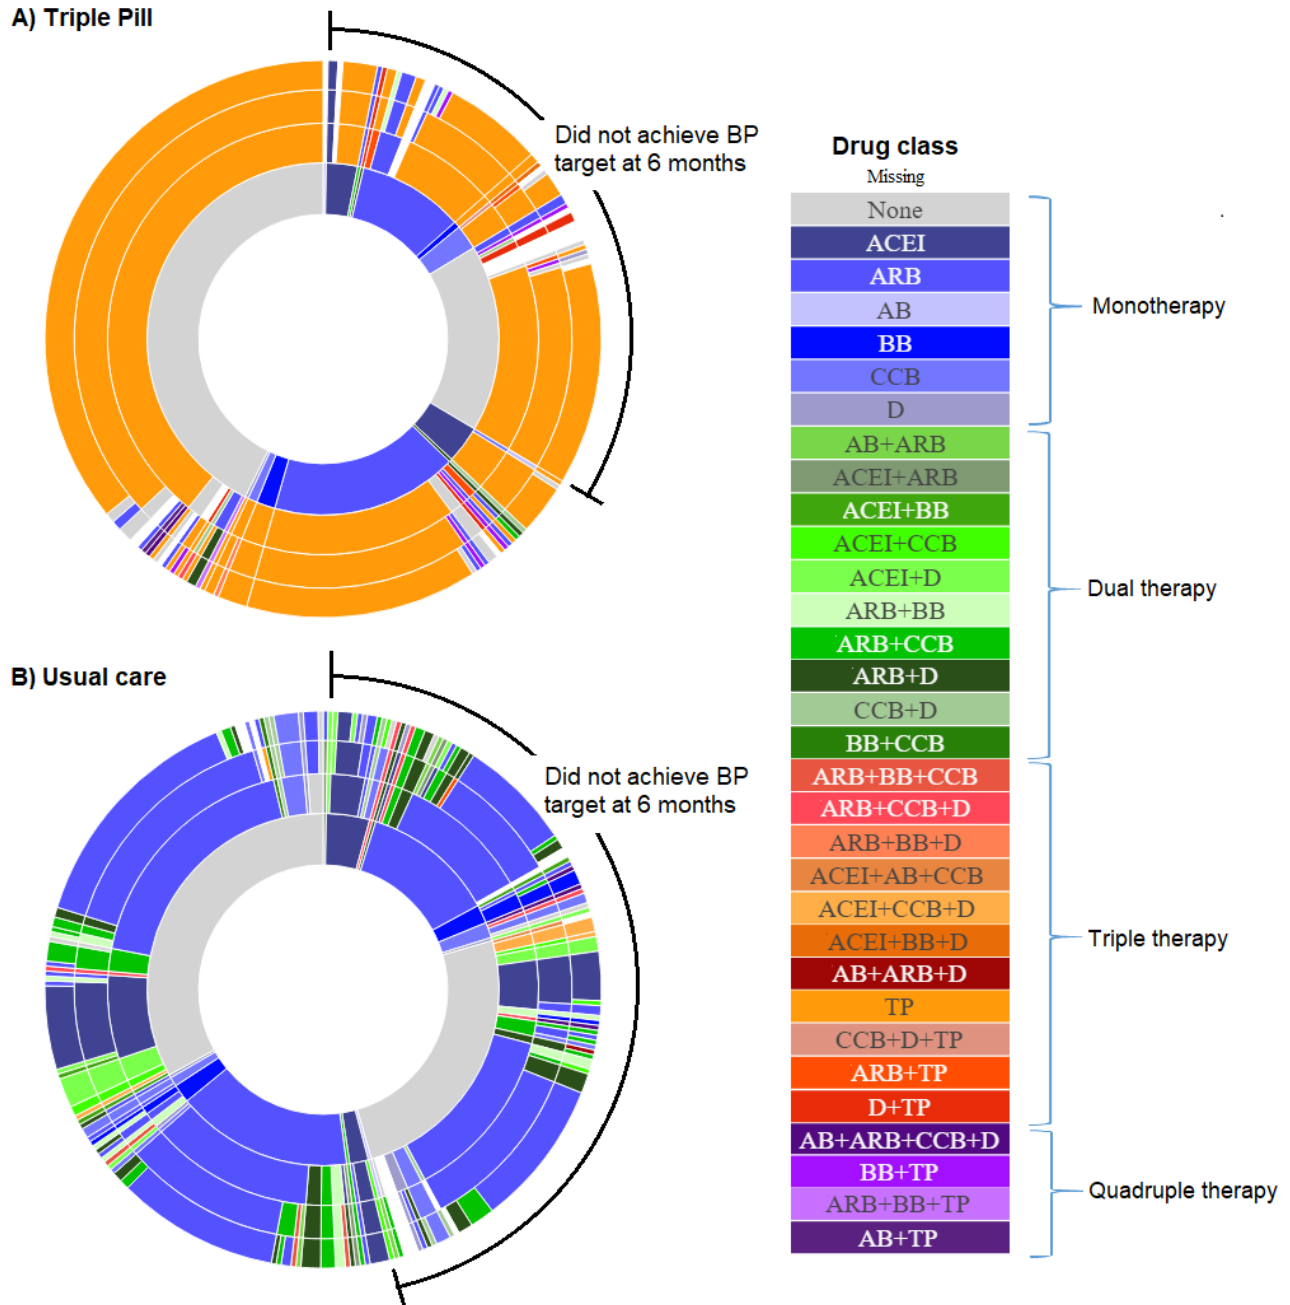

Grey, blue, green, orange/red, and purple indicate, 0, 1, 2, 3 and 4 BP-lowering drug(s), respectively. White represents patients who missed their follow-up visit. Innermost to outermost circles represent BP-lowering drugs taken at randomization, week 6, week 12, and 6 months (end of study). AB, alpha blocker; ACEI, angiotensin converting enzyme inhibitor; ARB, angiotensin receptor blocker; BB, beta-blocker; CCB, calcium channel blocker; D, diuretic; TP, Triple Pill

**eFigure 2.** Number of unique clinical pathways among patients in the triple pill and usual care groups

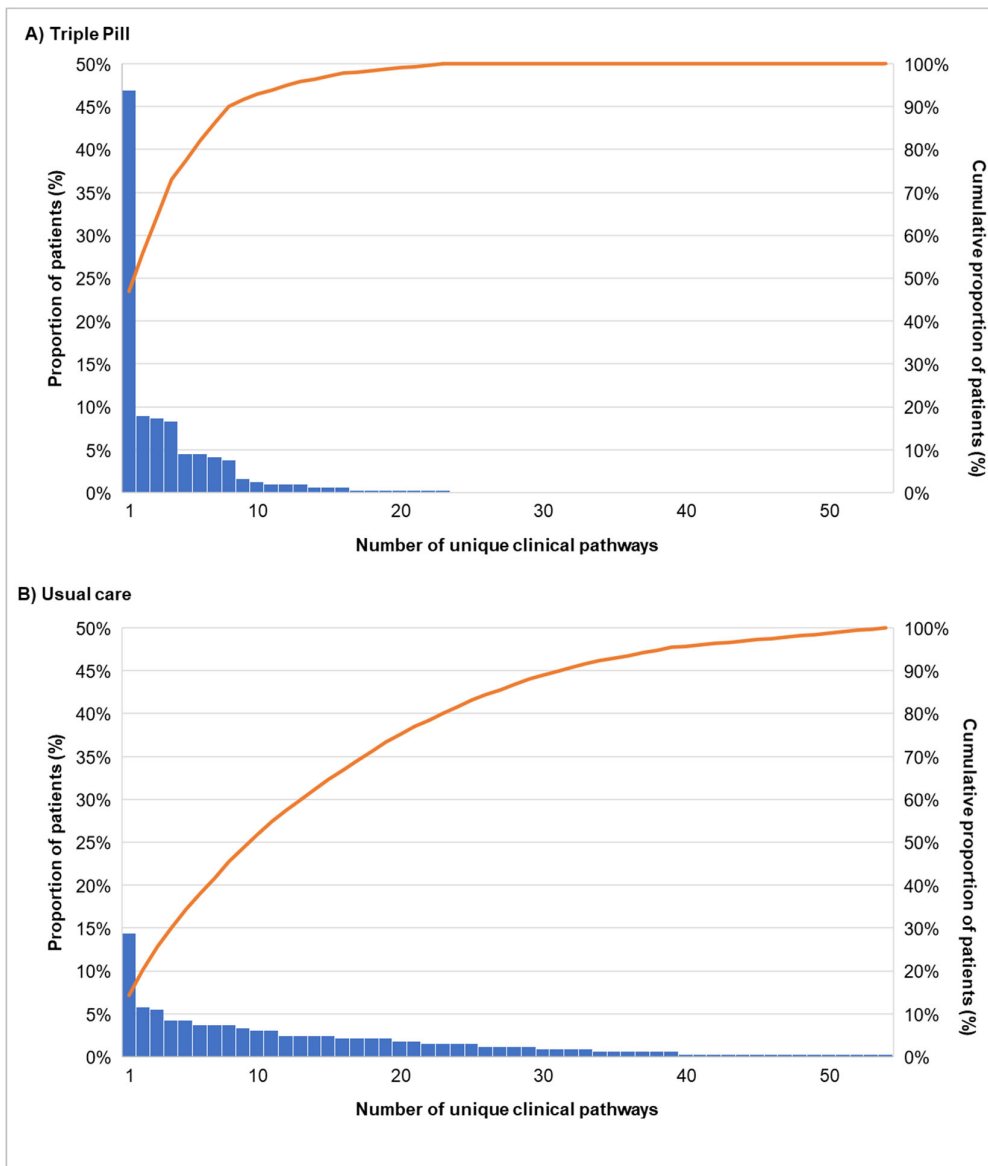

Each potential clinical pathway was defined by the presence or absence of BP control at week 6, week 12 and end of study and by treatment intensification at randomization, week 6 and week 12 visits. There were 23 unique clinical pathways in the triple group compared to 54 in the usual care group. The ten most common clinical pathways are shown in supplementary table 1.
